# Supplementary material for: Prevalence of a BRCA2 Pathogenic Variant in Hereditary-Breast-and-Ovarian-Cancer-Syndrome Families with Increased Risk of Pancreatic Cancer in a Restricted Italian Area
Source: MDPI journal article supplement (doi:10.3390/cancers15072132), 2023-04-03
Supplement: s1 [file s1]

**Table S1.** Clinical history of family members with disease-associated *BRCA2* pathogenic variant. BC, breast cancer; mBC, male breast cancer; BC IL, BC ipsilateral; BC CL, BC controlateral; OC, ovarian cancer; PDAC, Pancreatic Ductal Adenocarcinoma; PrC, prostate cancer; IPMN, Intraductal Papillary Mucinous Neoplasm; WT wild type; BRCA2 +, PV carrier condition; \* no test available; A219 family has additional cases not included in the table.

| Sample ID |              |                              |                                         |                 |                       |                        |                       |                     |              |
|-----------|--------------|------------------------------|-----------------------------------------|-----------------|-----------------------|------------------------|-----------------------|---------------------|--------------|
|           | 01           | 02                           | 03                                      | 04              | 05                    | 06                     | 07                    | 08                  | 09           |
| Family    | <b>A141</b>  | Brca2 +<br>BC<br>PDAC        | Brca2 +<br>BC<br>BC CL<br>IPMN          | Brca2 +         | Brca2 +<br>PDAC       | Brca2 +<br>IPMN        | Wt                    | Brca2 +             |              |
|           | <b>A213</b>  | Brca2 +<br>BC<br>BC CL       | Brca2+<br>BC<br>OC                      | Brca2 +         | Brca2 +<br>BC         | Brca2 +<br>BC<br>BC IL | Brca2+<br>BC<br>BC CL | WT                  | Brca2+<br>Wt |
|           | <b>A219</b>  | Brca2 +<br>BC                | Brca2 +<br>PDAC                         | Brca2 +<br>PDAC | Brca2 +<br>BC         | Brca2 +                | Brca2+<br>BC          | Brca2 +<br>wt<br>BC | Brca2+<br>BC |
|           | <b>A325</b>  | Brca2 +<br>BC                | Brca2 +<br>PrC<br>mBC<br>mBC CL<br>IPMN | Brca2 +         | WT                    | Brca2 +<br>BC          | Brca2+                | WT                  |              |
|           | <b>A597</b>  | Brca2 +                      | Brca2 +<br>OC                           | WT              | WT                    | WT                     | WT                    |                     |              |
|           | <b>A726</b>  | Brca2 +<br>BC<br>BC CL<br>OC | Brca2 +<br>OC<br>PDAC                   | Brca2 +         | OC<br>*               |                        |                       |                     |              |
|           | <b>A815</b>  | Brca2 +<br>BC                | WT<br>BC                                | Brca2 +<br>PDAC | Wt                    | Wt                     | Wt                    | BC*                 |              |
|           | <b>B179</b>  | Brca2 +<br>BC                | Brca2 +                                 | Brca2 +         | Wt                    | Wt                     | Brca2+                | Wt                  |              |
|           | <b>B302</b>  | Brca2 +<br>BC<br>IPMN        | Brca2 +<br>BC<br>BC CL<br>IPMN          | OC*             | Wt                    | Wt                     |                       |                     |              |
|           | <b>B717</b>  | Brca2 +<br>BC                | Brca2 +                                 | Wt              | Brca2 +<br>PDAC       | Brca2 +<br>BC<br>BC IL | WT                    | Brca2 +             |              |
|           | <b>B849</b>  | Brca2 +<br>BC<br>BC IL       | Brca2 +<br>PrC                          | BC*<br>WT       | Brca2 +<br>BC<br>PDAC | BC*                    | Brca2+<br>BC          | Brca2 +<br>BC       | Brca2+       |
|           | <b>B1731</b> | Wt                           | Brca2 +<br>PDAC                         | Wt              | BC*                   | OC<br>PDAC*            |                       |                     |              |
|           | <b>B2000</b> | Brca2 +<br>BC                | Brca2 +<br>mBC                          |                 |                       |                        |                       |                     |              |
